# Supplementary material for: Temperature- and pressure-induced phase transitions in the niccolite-type formate framework of [H3N(CH3)4NH3][Mn2(HCOO)6]
Source: Royal Society of Chemistry journal article supplement (doi:10.1039/c6tc00611f), 2016-01-01
Supplement: c6tc00611f1.pdf [file c6tc00611f1.pdf]

Supporting information for

**Temperature- and pressure-induced phase transitions in niccolite-type formate framework of  
[H<sub>3</sub>N(CH<sub>3</sub>)<sub>4</sub>NH<sub>3</sub>][Mn<sub>2</sub>(HCOO)<sub>6</sub>]**

*Mirosław Mączka,<sup>\*a</sup> Anna Gągor,<sup>a</sup> Nathalia Leal Marinho Costa,<sup>b</sup> Waldeci Paraguassu,<sup>b</sup> Adam Sieradzki,<sup>c</sup> and Adam Pikul<sup>a</sup>*

*<sup>a</sup>Institute of Low Temperature and Structure Research, Polish Academy of Sciences, Box 1410, 50-950 Wrocław 2, Poland*

*<sup>b</sup>Faculdade de Física, Universidade Federal do Pará, 66075-110, Belém, PA, Brazil*

*<sup>c</sup>Department of Experimental Physics, Wrocław University of Technology, Wybrzeże Wyspiańskiego 27, 50-370, Wrocław, Poland*

\*e-mail: m.maczka@int.pan.wroc.pl

Table S1. Experimental details.

For all structures:  $C_{10}H_{20}Mn_2N_2O_{12}$ ,  $M_r = 470.16$ . Experiments were carried out with Mo  $K\alpha$  radiation. H-atom parameters were constrained. Empirical absorption correction using spherical harmonics, implemented in SCALE3 ABSPACK scaling algorithm was used.

|                                                                            |                                     |                                      |                                      |                                      |                                      |
|----------------------------------------------------------------------------|-------------------------------------|--------------------------------------|--------------------------------------|--------------------------------------|--------------------------------------|
| Crystal system, space group                                                | Trigonal, $P-31c$                   | Monoclinic, $Cc$                     | Monoclinic, $Cc$                     | Monoclinic, $Cc$                     | Monoclinic, $Cc$                     |
| Temperature (K)                                                            | 360                                 | 345                                  | 298                                  | 160                                  | 90                                   |
| $a, b, c$ (Å)                                                              | 8.6962 (2), 8.6962 (2), 13.5672 (6) | 8.5685 (2), 15.3292 (4), 13.6602 (3) | 8.5608 (2), 15.3339 (3), 13.6433 (3) | 8.5542 (2), 15.2990 (3), 13.6149 (3) | 8.5477 (2), 15.2820 (3), 13.6085 (3) |
| $\alpha, \beta, \gamma$ (°)                                                | 90, 90, 120                         | 90, 90.226 (2), 90                   | 90, 90.190 (2), 90                   | 90, 90.100 (2), 90                   | 90, 90.060 (2), 90                   |
| $V$ (Å <sup>3</sup> ), $Z$                                                 | 894.44 (6), 2                       | 1794.24 (8), 4                       | 1790.95 (7), 4                       | 1781.79 (7), 4                       | 1777.61 (7), 4                       |
| $\mu$ (mm <sup>-1</sup> )                                                  | 1.475                               | 1.470                                | 1.473                                | 1.481                                | 1.484                                |
| Crystal size (mm)                                                          | 0.21 × 0.18 × 0.17                  | 0.21 × 0.18 × 0.17                   | 0.21 × 0.18 × 0.17                   | 0.20 × 0.18 × 0.16                   | 0.20 × 0.18 × 0.16                   |
| $T_{min}, T_{max}$                                                         | 0.846, 1.000                        | 0.965, 1.000                         | 0.863, 1.000                         | 0.897, 1.000                         | 0.909, 1.000                         |
| No. of measured, independent and observed [ $I > 2\sigma(I)$ ] reflections | 9753, 739, 675                      | 8647, 2751, 2323                     | 9298, 3788, 3599                     | 10639, 3880, 3596                    | 10570, 3860, 3638                    |
| Diffractometer                                                             | Sapphire1,                          | Sapphire1,                           | Sapphire1,                           | Atlas                                | Atlas                                |
| $R_{int}$                                                                  | 0.023                               | 0.035                                | 0.018                                | 0.030                                | 0.038                                |
| $(\sin \theta/\lambda)_{max}$ (Å <sup>-1</sup> )                           | 0.665                               | 0.610                                | 0.667                                | 0.694                                | 0.694                                |
| $R[F^2 > 2\sigma(F^2)], wR(F^2), S$                                        | 0.048, 0.139, 1.2                   | 0.031, 0.067, 0.98                   | 0.033, 0.084, 1.10                   | 0.026, 0.060, 1.04                   | 0.026, 0.055, 1.03                   |
| No. of reflections                                                         | 739                                 | 2751                                 | 3788                                 | 3880                                 | 3860                                 |
| No. of parameters                                                          | 44                                  | 246                                  | 239                                  | 239                                  | 239                                  |
| No. of restraints                                                          | 3                                   | 14                                   | 10                                   | 10                                   | 10                                   |
| $\Delta\rho_{max}, \Delta\rho_{min}$ (e Å <sup>-3</sup> )                  | 0.91, -0.58                         | 0.34, -0.35                          | 1.69, -0.49                          | 0.74, -0.28                          | 0.29, -0.31                          |
| Absolute structure                                                         | –                                   |                                      |                                      | Refined as an inversion twin.        |                                      |
| Absolute structure parameter                                               | –                                   | 0.38 (5)                             | 0.34 (2)                             | 0.41 (2)                             | 0.404 (19)                           |

Computer programs: *CrysAlis PRO*, Agilent Technologies, Version 1.171.37.35h. *CrysAlis PRO* 1.171.38.41 (Rigaku OD, 2015), *SHELXL2014/7*

Table S2. Selected geometric parameters (Å)

| (360K)                 |             | (345K)                  |            | (298K)                 |           |
|------------------------|-------------|-------------------------|------------|------------------------|-----------|
| Mn1—O1 <sup>i</sup>    | 2.174 (3)   | Mn1—O5                  | 2.138 (8)  | Mn1—O5                 | 2.140 (3) |
| Mn1—O1 <sup>ii</sup>   | 2.174 (3)   | Mn1—O3                  | 2.182 (5)  | Mn1—O6                 | 2.169 (2) |
| Mn1—O1 <sup>iii</sup>  | 2.174 (3)   | Mn1—O6                  | 2.166 (7)  | Mn1—O3                 | 2.177 (2) |
| Mn1—O1 <sup>iv</sup>   | 2.174 (3)   | Mn1—O2                  | 2.195 (5)  | Mn1—O2                 | 2.193 (2) |
| Mn1—O1 <sup>v</sup>    | 2.174 (3)   | Mn1—O4                  | 2.198 (6)  | Mn1—O1                 | 2.192 (2) |
| Mn1—O1                 | 2.174 (3)   | Mn1—O1                  | 2.194 (6)  | Mn1—O4                 | 2.207 (2) |
| Mn2—O2                 | 2.173 (2)   | Mn2—O11                 | 2.141 (6)  | Mn2—O11                | 2.140 (3) |
| Mn2—O2 <sup>vi</sup>   | 2.173 (2)   | Mn2—O8                  | 2.165 (6)  | Mn2—O8                 | 2.162 (2) |
| Mn2—O2 <sup>vii</sup>  | 2.173 (2)   | Mn2—O7                  | 2.161 (6)  | Mn2—O9                 | 2.166 (2) |
| Mn2—O2 <sup>viii</sup> | 2.173 (2)   | Mn2—O9                  | 2.174 (6)  | Mn2—O7                 | 2.178 (3) |
| Mn2—O2 <sup>ix</sup>   | 2.173 (2)   | Mn2—O10                 | 2.198 (6)  | Mn2—O12                | 2.199 (2) |
| Mn2—O2 <sup>x</sup>    | 2.173 (2)   | Mn2—O12                 | 2.198 (5)  | Mn2—O10                | 2.205 (2) |
| C1—O1                  | 1.225 (4)   | O1—C6                   | 1.225 (10) | O1—C6                  | 1.242 (4) |
| C1—O2                  | 1.229 (4)   | O2—C5                   | 1.266 (10) | O2—C5                  | 1.259 (4) |
| N1—C2                  | 1.4484 (10) | O3—C1                   | 1.258 (10) | O3—C1                  | 1.250 (4) |
| C2—C3                  | 1.499 (8)   | O4—C2                   | 1.229 (9)  | O4—C2                  | 1.235 (4) |
| C3—C3 <sup>v</sup>     | 1.445 (9)   | O5—C4                   | 1.214 (11) | O5—C4                  | 1.227 (4) |
|                        |             | O6—C3                   | 1.235 (10) | O6—C3                  | 1.224 (4) |
|                        |             | O7—C5 <sup>xi</sup>     | 1.249 (9)  | O7—C5 <sup>i</sup>     | 1.244 (4) |
|                        |             | O8—C1                   | 1.235 (10) | O8—C1                  | 1.236 (4) |
|                        |             | O9—C6 <sup>xii</sup>    | 1.219 (9)  | O9—C6 <sup>ii</sup>    | 1.232 (4) |
|                        |             | O10—C2 <sup>xiii</sup>  | 1.231 (10) | O10—C2 <sup>iii</sup>  | 1.233 (4) |
|                        |             | O11—C4 <sup>xiv</sup>   | 1.201 (11) | O11—C4 <sup>iv</sup>   | 1.217 (4) |
|                        |             | O12—C3 <sup>xv</sup>    | 1.248 (10) | O12—C3 <sup>v</sup>    | 1.248 (4) |
|                        |             | C2—O10 <sup>xvi</sup>   | 1.231 (10) | C2—O10 <sup>vi</sup>   | 1.233 (4) |
|                        |             | C3—O12 <sup>xvii</sup>  | 1.248 (10) | C3—O12 <sup>vii</sup>  | 1.248 (4) |
|                        |             | C4—O11 <sup>xviii</sup> | 1.201 (11) | C4—O11 <sup>viii</sup> | 1.217 (4) |
|                        |             | C5—O7 <sup>xix</sup>    | 1.249 (9)  | C5—O7 <sup>ix</sup>    | 1.244 (4) |
|                        |             | C6—O9 <sup>xx</sup>     | 1.219 (9)  | C6—O9 <sup>x</sup>     | 1.232 (4) |
|                        |             | N1—C14                  | 1.475 (10) | C11—N2                 | 1.479 (5) |
|                        |             | N2—C11                  | 1.477 (9)  | C11—C12                | 1.545 (6) |
|                        |             | C11—C12                 | 1.521 (9)  | C12—C13                | 1.474 (4) |
|                        |             | C12—C13                 | 1.501 (6)  | C13—C14                | 1.549 (6) |
|                        |             | C13—C14                 | 1.561 (11) | C14—N1                 | 1.483 (5) |
|                        |             | C15—C16                 | 1.465 (13) |                        |           |

  

| (160K)  |           | (90K)   |           |
|---------|-----------|---------|-----------|
| Mn1—O5  | 2.136 (4) | Mn1—O5  | 2.138 (3) |
| Mn1—O6  | 2.172 (3) | Mn1—O6  | 2.170 (3) |
| Mn1—O3  | 2.176 (3) | Mn1—O3  | 2.173 (3) |
| Mn1—O2  | 2.191 (3) | Mn1—O1  | 2.187 (3) |
| Mn1—O1  | 2.191 (3) | Mn1—O2  | 2.192 (3) |
| Mn1—O4  | 2.203 (3) | Mn1—O4  | 2.202 (3) |
| Mn2—O11 | 2.146 (3) | Mn2—O11 | 2.148 (3) |
| Mn2—O8  | 2.163 (3) | Mn2—O8  | 2.159 (3) |
| Mn2—O9  | 2.167 (3) | Mn2—O9  | 2.170 (2) |
| Mn2—O7  | 2.177 (3) | Mn2—O7  | 2.176 (2) |
| Mn2—O10 | 2.192 (3) | Mn2—O10 | 2.190 (2) |
| Mn2—O12 | 2.202 (3) | Mn2—O12 | 2.203 (3) |
| O1—C6   | 1.251 (5) | O1—C6   | 1.257 (5) |
| O2—C5   | 1.266 (5) | O2—C5   | 1.267 (4) |
| O3—C1   | 1.251 (5) | O3—C1   | 1.264 (4) |
| O4—C2   | 1.248 (5) | O4—C2   | 1.255 (4) |

|                       |           |                        |           |
|-----------------------|-----------|------------------------|-----------|
| O5—C4                 | 1.240 (5) | O5—C4                  | 1.237 (5) |
| O6—C3                 | 1.238 (5) | O6—C3                  | 1.246 (4) |
| O7—C5 <sup>i</sup>    | 1.250 (5) | O7—C5 <sup>i</sup>     | 1.254 (4) |
| O8—C1                 | 1.248 (5) | O8—C1                  | 1.250 (4) |
| O9—C6 <sup>ii</sup>   | 1.247 (5) | O9—C6 <sup>ii</sup>    | 1.248 (4) |
| O10—C2 <sup>iii</sup> | 1.250 (5) | O10—C2 <sup>iii</sup>  | 1.255 (4) |
| O11—C4 <sup>iv</sup>  | 1.239 (5) | O11—C4 <sup>iv</sup>   | 1.251 (4) |
| C2—O10 <sup>v</sup>   | 1.250 (5) | O12—C3 <sup>v</sup>    | 1.255 (4) |
| C3—O12 <sup>vi</sup>  | 1.260 (5) | C2—O10 <sup>vi</sup>   | 1.255 (4) |
| C4—O11 <sup>vii</sup> | 1.239 (5) | C3—O12 <sup>vii</sup>  | 1.255 (4) |
| C5—O7 <sup>viii</sup> | 1.250 (5) | C4—O11 <sup>viii</sup> | 1.251 (4) |
| C6—O9 <sup>ix</sup>   | 1.247 (5) | C5—O7 <sup>ix</sup>    | 1.254 (4) |
| C11—N2                | 1.493 (5) | C6—O9 <sup>x</sup>     | 1.248 (4) |
| C11—C12               | 1.530 (5) | C11—N2                 | 1.496 (4) |
| C12—C13               | 1.503 (4) | C11—C12                | 1.523 (5) |
| C13—C14               | 1.535 (5) | C12—C13                | 1.515 (4) |
| C14—N1                | 1.498 (5) | C13—C14                | 1.528 (5) |
| O6—C3                 | 1.238 (5) | C14—N1                 | 1.494 (4) |

Symmetry code(s): (i)  $-y+1, -x+1, -z+1/2$ ; (ii)  $x, x-y, -z+1/2$ ; (iii)  $-x+y+1, -x+1, z$ ; (iv)  $-y+1, x-y, z$ ; (v)  $-x+y+1, y, -z+1/2$ ; (vi)  $-x+2, -y, -z$ ; (vii)  $x-y, x-1, -z$ ; (viii)  $-x+y+2, -x+1, z$ ; (ix)  $-y+1, x-y-1, z$ ; (x)  $y+1, -x+y+1, -z$ ; (xi)  $x+1/2, -y+3/2, z-1/2$ ; (xii)  $x-1/2, y-1/2, z$ ; (xiii)  $x, -y+1, z-1/2$ ; (xiv)  $x-1/2, -y+3/2, z-1/2$ ; (xv)  $x+1/2, y-1/2, z$ ; (xvi)  $x, -y+1, z+1/2$ ; (xvii)  $x-1/2, y+1/2, z$ ; (xviii)  $x+1/2, -y+3/2, z+1/2$ ; (xix)  $x-1/2, -y+3/2, z+1/2$ ; (xx)  $x+1/2, y+1/2, z$ .

Table S3. Selected hydrogen bond parameters.

| $D-H\cdots A$                     | $D-H$ (Å) | $H\cdots A$ (Å) | $D\cdots A$ (Å) | $D-H\cdots A$ (°) |
|-----------------------------------|-----------|-----------------|-----------------|-------------------|
| (345K)                            |           |                 |                 |                   |
| N1—H1A $\cdots$ O12 <sup>ii</sup> | 0.89      | 2.02            | 2.863 (7)       | 156.9             |
| N1—H1B $\cdots$ O4 <sup>iii</sup> | 0.89      | 2.26            | 3.138 (8)       | 170.6             |
| N1—H1C $\cdots$ O3 <sup>iv</sup>  | 0.89      | 1.93            | 2.823 (8)       | 175.1             |
| N2—H2A $\cdots$ O10 <sup>v</sup>  | 0.89      | 2.01            | 2.895 (9)       | 175.4             |
| N2—H2B $\cdots$ O1                | 0.89      | 2.11            | 2.939 (8)       | 154.9             |
| N2—H2C $\cdots$ O2 <sup>vi</sup>  | 0.89      | 2.03            | 2.912 (8)       | 170.5             |
| (298K)                            |           |                 |                 |                   |
| N1—H1A $\cdots$ O12 <sup>i</sup>  | 0.89      | 2.03            | 2.855 (4)       | 153.2             |
| N1—H1B $\cdots$ O4 <sup>ii</sup>  | 0.89      | 2.23            | 3.118 (4)       | 174.5             |
| N1—H1C $\cdots$ O3 <sup>iii</sup> | 0.89      | 1.94            | 2.829 (4)       | 178.0             |
| N2—H2A $\cdots$ O2 <sup>iv</sup>  | 0.89      | 2.04            | 2.925 (4)       | 172.2             |
| N2—H2A $\cdots$ O7 <sup>v</sup>   | 0.89      | 2.59            | 3.171 (4)       | 123.5             |
| N2—H2B $\cdots$ O10 <sup>vi</sup> | 0.89      | 2.00            | 2.880 (4)       | 171.6             |
| N2—H2C $\cdots$ O1                | 0.89      | 2.08            | 2.926 (4)       | 158.7             |
| (160K)                            |           |                 |                 |                   |
| N1—H1A $\cdots$ O12 <sup>i</sup>  | 0.89      | 2.01            | 2.842 (4)       | 156.2             |
| N1—H1B $\cdots$ O4 <sup>ii</sup>  | 0.89      | 2.18            | 3.065 (4)       | 172.1             |
| N1—H1C $\cdots$ O3 <sup>iii</sup> | 0.89      | 1.93            | 2.820 (4)       | 175.5             |
| N2—H2A $\cdots$ O2 <sup>iv</sup>  | 0.89      | 2.04            | 2.919 (4)       | 171.4             |
| N2—H2A $\cdots$ O7 <sup>v</sup>   | 0.89      | 2.57            | 3.164 (4)       | 124.7             |
| N2—H2B $\cdots$ O10 <sup>vi</sup> | 0.89      | 1.99            | 2.868 (4)       | 170.9             |
| N2—H2C $\cdots$ O1                | 0.89      | 2.05            | 2.900 (4)       | 159.4             |
| (90K)                             |           |                 |                 |                   |
| N1—H1A $\cdots$ O12 <sup>i</sup>  | 0.89      | 2.00            | 2.843 (4)       | 158.7             |
| N1—H1B $\cdots$ O4 <sup>ii</sup>  | 0.89      | 2.17            | 3.045 (3)       | 169.2             |
| N1—H1C $\cdots$ O3 <sup>iii</sup> | 0.89      | 1.93            | 2.817 (3)       | 172.6             |
| N2—H2A $\cdots$ O2 <sup>iv</sup>  | 0.89      | 2.03            | 2.908 (4)       | 171.3             |
| N2—H2A $\cdots$ O7 <sup>v</sup>   | 0.89      | 2.57            | 3.160 (4)       | 124.9             |
| N2—H2B $\cdots$ O10 <sup>vi</sup> | 0.89      | 1.98            | 2.859 (3)       | 170.4             |
| N2—H2C $\cdots$ O1                | 0.89      | 2.04            | 2.897 (4)       | 160.1             |

Symmetry code(s): (i)  $x+1/2, -y+3/2, z+1/2$ ; (ii)  $x, -y+1, z-1/2$ ; (iii)  $x, y, z-1$ ; (iv)  $x-1/2, -y+3/2, z-1/2$ ; (v)  $x+1/2, y+1/2, z$ ; (vi)  $x, -y+2, z-1/2$ ; (vii)  $x-1/2, -y+3/2, z+1/2$ ; (viii)  $x-1/2, y+1/2, z$ .

Tables S4. The results of the mode analysis performed in AMPLIMODES.

|    |         |      | Atomic displacements |         |         |        |
|----|---------|------|----------------------|---------|---------|--------|
|    | WP      | Atom | ux                   | uy      | uz      | u      |
| 4a | (x,y,z) | Mn1  | -0.0013              | 0.0024  | -0.0006 | 0.0390 |
| 4a | (x,y,z) | Mn2  | 0.0005               | 0.0020  | 0.0014  | 0.0366 |
| 4a | (x,y,z) | C1   | 0.0190               | 0.0050  | 0.0071  | 0.2067 |
| 4a | (x,y,z) | C1_2 | 0.0070               | 0.0209  | -0.0127 | 0.3659 |
| 4a | (x,y,z) | C1_3 | 0.0053               | 0.0037  | -0.0050 | 0.0997 |
| 4a | (x,y,z) | C1_4 | -0.0086              | -0.0003 | 0.0029  | 0.0850 |
| 4a | (x,y,z) | C1_5 | -0.0083              | -0.0011 | -0.0073 | 0.1247 |
| 4a | (x,y,z) | C1_6 | 0.0018               | -0.0126 | -0.0118 | 0.2496 |
| 4a | (x,y,z) | O1   | 0.0109               | 0.0026  | 0.0032  | 0.1120 |
| 4a | (x,y,z) | O1_2 | 0.0046               | -0.0045 | 0.0103  | 0.1613 |
| 4a | (x,y,z) | O1_3 | 0.0153               | 0.0037  | -0.0134 | 0.2338 |
| 4a | (x,y,z) | O1_4 | -0.0177              | 0.0043  | -0.0113 | 0.2282 |
| 4a | (x,y,z) | O1_5 | -0.0132              | 0.0040  | -0.0032 | 0.1370 |
| 4a | (x,y,z) | O1_6 | -0.0258              | 0.0019  | 0.0262  | 0.4249 |
| 4a | (x,y,z) | O2   | 0.0129               | 0.0044  | 0.0021  | 0.1336 |
| 4a | (x,y,z) | O2_2 | 0.0111               | 0.0013  | 0.0110  | 0.1801 |
| 4a | (x,y,z) | O2_3 | 0.0144               | 0.0051  | -0.0098 | 0.1999 |
| 4a | (x,y,z) | O2_4 | -0.0059              | 0.0024  | 0.0005  | 0.0630 |
| 4a | (x,y,z) | O2_5 | -0.0110              | 0.0002  | -0.0075 | 0.1412 |
| 4a | (x,y,z) | O2_6 | -0.0110              | 0.0112  | 0.0182  | 0.3158 |

NOTE: ux, uy and uz are given in relative units. |u| is the absolute distance given in Å

**Maximum atomic displacement in the distortion,  $\Delta$ : 0.4249 Å**

**Total distortion amplitude: 1.2907 Å**

### Symmetry Modes Summary

| Atoms      | W<br>P | Modes                                     |
|------------|--------|-------------------------------------------|
| O1, O2, C1 | 12i    | GM1+(3), GM3+(6), GM2-(3), <b>GM3-(6)</b> |
| Mn1        | 2d     | GM3+(1), GM2-(1), <b>GM3-(1)</b>          |
| Mn2        | 2b     | GM2-(1), <b>GM3-(2)</b>                   |

Note: The primary mode is written in bold letters

### Summary of Amplitudes

| K-vector | Irrep | Direction         | Isotropy subgroup |       | Dimension | Amplitude (Å) |
|----------|-------|-------------------|-------------------|-------|-----------|---------------|
| (0,0,0)  | GM1+  | (a)               | P-31c             | (163) | 9         | 0.2152        |
| (0,0,0)  | GM3+  | (-0.500a,0.866a)  | C2/c              | (15)  | 19        | 1.0779        |
| (0,0,0)  | GM2-  | (a)               | P31c              | (159) | 11        | 0.3203        |
| (0,0,0)  | GM3-  | (-0.866a,-0.500a) | Cc                | (9)   | 21        | 0.5959        |

**Global distortion:** 1.2907 Å

### Summary of AMPLIMODES analysis:

The structure of the monoclinic phase has four distortion modes of  $P\bar{3}1c$ ,  $C2/c$ ,  $P31c$  and  $Cc$  symmetry. The two latter are polar, and the last one is a primary mode. The displacements of the metal ions have the symmetry of both polar modes,  $Cc$  and  $P31c$ , and give rise to the spontaneous polarization. The  $Mn^{2+}$  ions, on both lattice sites, have nearly the same shifts, equal to  $\sim 0.04$  Å. The monoclinic distortion affects also the positions of oxygen and carbon atoms that were occupied in trigonal phase. All of them shift accordingly to four symmetry modes accompanying the  $P\bar{3}1c$  to  $Cc$  symmetry reduction with a similar contribution of polar and non-polar modes. The maximum atomic displacement in the distortion concerns O(1) oxygen that shifts 0.4 Å. The calculations were done for ordered atoms: metal centers as well as oxygen and carbon atoms from the formate linkers. Similar analysis has also been done for  $Mg_2[COOH]_6^{2-}$  framework basing on the data from Ref. 1 for comparison. The total distortion amplitude that is given by the square root of the sum of the squares of all atomic displacements is equal to 1.3 Å for  $Mn_2[COOH]_3^{2-}$  and is only slightly higher from the global distortion of the  $Mg_2[COOH]_3^{2-}$  framework which amounts to 1.2 Å. In both compounds, the total amplitude of the polar primary mode equals 0.6 Å, whereas the amplitude of the strongest secondary mode (of  $C2/c$  symmetry) amounts to nearly 1.1 Å showing a comparable contribution of the primary and secondary modes into distortion. Å.

[1] R. Shang, G.-C. Xu, Z.-M. Wang, S. Gao, *Chem. Eur. J.* 2014, **20**, 1146-1158.

Table S5. IR and Raman frequencies (in cm<sup>-1</sup>) of bnMn and suggested assignments.<sup>a</sup>

| Raman  | Raman         | IR            | IR                             | assignment                          |
|--------|---------------|---------------|--------------------------------|-------------------------------------|
| 380 K  | 80 K          | 410 K         | 5 K                            |                                     |
|        |               | 3171sh        | 3161w, 3142m                   | v(NH <sub>3</sub> )                 |
|        |               | 3066m,b       | 3098sh, 3073sh                 | v(NH <sub>3</sub> )                 |
|        |               |               | 3062sh                         |                                     |
|        |               | 3047w         | 3031m                          | v(NH <sub>3</sub> )                 |
|        |               | 3022w         | 3013m                          | v(NH <sub>3</sub> )                 |
| 3004m  | 2997m         | 3001w         | 2998w                          | v <sub>as</sub> (CH <sub>2</sub> )  |
| 2968s  | 2967sh, 2962s | 2969m         | 2970w                          | v <sub>as</sub> (CH <sub>2</sub> )  |
|        | 2958sh        |               |                                |                                     |
|        | 2942w         | 2945vw        |                                | v <sub>as</sub> (CH <sub>2</sub> )  |
|        |               | 2940m,b       | 2950m                          | v(NH <sub>3</sub> )                 |
| 2938s  | 2931s         |               |                                | v <sub>as</sub> (CH <sub>2</sub> )  |
| 2912vw |               |               | 2909w                          | overtone δ(CH <sub>2</sub> )        |
| 2893w  | 2898w, 2892w  |               | 2899w                          | v <sub>s</sub> (CH <sub>2</sub> )   |
| 2862sh | 2861s         |               | 2872w, 2861w<br>2859w          | v <sub>s</sub> (CH <sub>2</sub> )   |
| 2841s  | 2841s         | 2848sh, 2836m | 2845sh, 2841m,<br>2839m, 2832m | v <sub>1</sub> (HCOO <sup>-</sup> ) |
|        |               |               | 2818w                          |                                     |
|        |               | 2779w,b       | 2793vw, 2785vw                 | overtones                           |
|        |               |               | 2772vw                         |                                     |
|        |               | 2739vw        | 2749vw                         | overtones                           |
|        |               | 2721w         | 2731w                          | overtones                           |
|        |               | 2683vw,b      | 2700w                          | overtones                           |
|        |               | 2618vw,b      | 2645w                          | overtones                           |



|                  |                         |                                |                                       |                            |
|------------------|-------------------------|--------------------------------|---------------------------------------|----------------------------|
|                  |                         | 2603w,b                        | 2609w                                 | overtones                  |
|                  |                         |                                | 1667w, 1652vw                         | $\delta_{as}(\text{NH}_3)$ |
|                  |                         | 1628sh                         | 1629w                                 | $\delta_{as}(\text{NH}_3)$ |
|                  |                         | 1590s                          | 1594s, 1582s                          | $\nu_4(\text{HCOO}^-)$     |
|                  |                         | 1516w,b                        | 1535m, 1530m                          | $\delta_s(\text{NH}_3)$    |
| 1454vw,<br>1439w | 1461vw, 1437vw<br>1435w | 1460vw, 1452w<br>1447w, 1435vw | 1462w, 1453w,<br>1446w, 1435w         | $\delta(\text{CH}_2)$      |
| 1374m            | 1391sh, 1375s<br>1368w  | 1386sh, 1376s                  | 1388s, 1382s<br>1376s                 | $\nu_5(\text{HCOO}^-)$     |
| 1359s            | 1362s, 1352s            | 1359sh, 1350s                  | 1368m, 1364s<br>1360w, 1353s<br>1346s | $\nu_2(\text{HCOO}^-)$     |
|                  | 1330vw, 1318vw          |                                | 1317w, 1309w                          | $\omega(\text{CH}_2)$      |
|                  |                         |                                | 1284vw                                | $\tau(\text{CH}_2)$        |
|                  |                         | 1262w,b                        | 1264w, 1257sh                         | $\tau(\text{CH}_2)$        |
|                  | 1203vw                  |                                | 1203w                                 | $\tau(\text{CH}_2)$        |
|                  |                         | 1167w                          | 1171w                                 | $\rho(\text{NH}_3)$        |
|                  |                         | 1104w                          | 1114w                                 | $\rho(\text{NH}_3)$        |
| 1066w            | 1072w                   | 1070w                          | 1082w, 1075w<br>1070w                 | $\nu_6(\text{HCOO}^-)$     |
|                  |                         | 1050w                          |                                       | $\nu(\text{CC})$           |
| 1027w            |                         | 1025w                          | 1032w, 1024vw                         | $\nu(\text{CC})$           |
| 998w             | 1013w                   |                                |                                       | $\nu(\text{CC})$           |
|                  | 998vw                   | 994w                           | 998w                                  | $\rho(\text{NH}_3)$        |
|                  |                         | 902w,b                         | 916w                                  | $\rho(\text{NH}_3)$        |
| 871w             | 879w                    | 876sh, 882w                    | 880w, 888w                            | $\nu(\text{CN})$           |

|               |                           |       |                                         |                                                        |
|---------------|---------------------------|-------|-----------------------------------------|--------------------------------------------------------|
|               |                           | 841vw |                                         | overtone                                               |
| 790w,<br>787w | 799w, 793w<br>787w        | 789s  | 807s, 801w<br>797sh, 795s<br>790s, 785s | $\nu_3(\text{HCOO}^-)$                                 |
|               |                           | 740w  | 739w                                    | $\rho(\text{CH}_2)$                                    |
|               | 516vw                     | 518vw |                                         | $\delta(\text{CCC})$                                   |
|               |                           |       | 478w, 491w                              | $\delta(\text{CCC})$                                   |
|               |                           | 444w  | 451m                                    | $\delta(\text{CCN})$                                   |
|               | 277w                      |       |                                         | L( $\text{HCOO}^-$ ) and T'( $\text{HCOO}^-$ )         |
| 218m          | 248m, 228m                |       |                                         | L( $\text{HCOO}^-$ )                                   |
| 174s          | 210sh, 201w<br>187m, 178m |       |                                         | L( $\text{HCOO}^-$ )                                   |
| 126s          | 161w, 144sh<br>138m, 129w |       |                                         | L( $\text{HCOO}^-$ )                                   |
| 101m          | 112m, 98w, 87m            |       |                                         | L( $\text{bnH}_2^{2+}$ ) and T'( $\text{bnH}_2^{2+}$ ) |

<sup>a</sup>Key: s, strong; m, medium; w, weak; vw, very weak; sh, shoulder; b, broad; Internal vibrations of  $\text{HCOO}^-$  ions are classified as C-H stretching ( $\nu_1$ ), symmetric C-O stretching ( $\nu_2$ ), antisymmetric C-O stretching ( $\nu_4$ ), symmetric O-C-O bending ( $\nu_3$ ), C-H in-plane bending ( $\nu_5$ ) and C-H out-of-plane bending ( $\nu_6$ ) modes. Internal vibrations of  $\text{bnH}_2^{2+}$  cation are subdivided into symmetric stretching ( $\nu_s(\text{CH}_2)$ ), antisymmetric stretching ( $\nu_{as}(\text{CH}_2)$ ), scissoring ( $\delta(\text{CH}_2)$ ), rocking ( $\rho(\text{CH}_2)$ ), wagging ( $\omega(\text{CH}_2)$ ) and torsion or twisting ( $\tau(\text{CH}_2)$ ) modes of the  $\text{CH}_2$  groups as well as symmetric stretching ( $\nu_s$ ), antisymmetric stretching ( $\nu_{as}$ ), bending ( $\delta$ ), rocking ( $\rho$ ) and torsion ( $\tau$ ) modes of the  $\text{NH}_3$  groups. The remaining vibrations correspond to CC and CN stretching as well as CCN in-plane bending and out-of-plane bending modes.

Table S6. Wavenumber intercepts at zero pressure ( $\omega_0$ ) and pressure coefficients ( $\alpha=d\omega/dP$ ), obtained from fitting of the experimental data by linear functions, for the three phases of bnMn.

| ambient pressure phase             |                                                 | Intermediate phase                 |                                                 | high-pressure phase                |                                                 | assignment             |
|------------------------------------|-------------------------------------------------|------------------------------------|-------------------------------------------------|------------------------------------|-------------------------------------------------|------------------------|
| $\omega_0$<br>( $\text{cm}^{-1}$ ) | $\alpha$<br>( $\text{cm}^{-1}\text{GPa}^{-1}$ ) | $\omega_0$<br>( $\text{cm}^{-1}$ ) | $\alpha$<br>( $\text{cm}^{-1}\text{GPa}^{-1}$ ) | $\omega_0$<br>( $\text{cm}^{-1}$ ) | $\alpha$<br>( $\text{cm}^{-1}\text{GPa}^{-1}$ ) |                        |
| 1372.3                             | 3.6                                             | 1378.1                             | 1.8                                             | 1380.3                             | 1.0                                             | $\nu_5(\text{HCOO}^-)$ |
| 1360.8                             | 3.4                                             | 1363.6                             | 1.0                                             | 1365.3                             | 1.9                                             | $\nu_2(\text{HCOO}^-)$ |
| 1350.5                             | 8.3                                             | 1353.1                             | 2.8                                             | 1360.1                             | 0.5                                             | $\nu_2(\text{HCOO}^-)$ |
| 1068.8                             | 0.3                                             | 1066.8                             | 4.2                                             | 1070.0                             | 5.7                                             | $\nu_6(\text{HCOO}^-)$ |
|                                    |                                                 |                                    |                                                 | 1067.5                             | 0.1                                             | $\nu_6(\text{HCOO}^-)$ |
|                                    |                                                 | 1037.4                             | 0.5                                             | 1048.1                             | -1.7                                            | $\nu(\text{CC})$       |
| 1009.4                             | -0.6                                            | 1008.1                             | -2.2                                            | 1004.7                             | 2.9                                             | $\nu(\text{CC})$       |
|                                    |                                                 |                                    |                                                 | 1001.2                             | -6.8                                            | $\nu(\text{CC})$       |
| 876.3                              | 1.5                                             | 875.4                              | 2.4                                             | 882.8                              | 0.8                                             | $\nu(\text{CN})$       |
| 794.7                              | 0.7                                             | 794.8                              | -1.0                                            | 784.2                              | 3.2                                             | $\nu_3(\text{HCOO}^-)$ |
| 784.8                              | 1.7                                             | 786.9                              | 0.1                                             | 776.2                              | -2.9                                            | $\nu_3(\text{HCOO}^-)$ |
| 512.5                              | 2.0                                             | 512.7                              | 4.3                                             | 511.2                              | 5.1                                             | $\delta(\text{CCC})$   |
| 316.5                              | 5.3                                             |                                    |                                                 |                                    |                                                 | $T'(\text{HCOO}^-)$    |
|                                    |                                                 |                                    |                                                 | 270.4                              | 12.7                                            | $L(\text{HCOO}^-)$     |
| 219.5                              | 6.7                                             | 227.3                              | 10.9                                            | 250.1                              | 0.4                                             | $L(\text{HCOO}^-)$     |
|                                    |                                                 |                                    |                                                 | 189.1                              | 12.2                                            | $L(\text{HCOO}^-)$     |
| 170.8                              | 4.6                                             | 177.9                              | 2.0                                             | 172.0                              | 4.7                                             | $L(\text{HCOO}^-)$     |
|                                    |                                                 |                                    |                                                 | 177.3                              | -1.2                                            | $L(\text{HCOO}^-)$     |
| 135.4                              | -7.3                                            | 137.7                              | -10.1                                           | 133.3                              | 0.8                                             | $L(\text{HCOO}^-)$     |

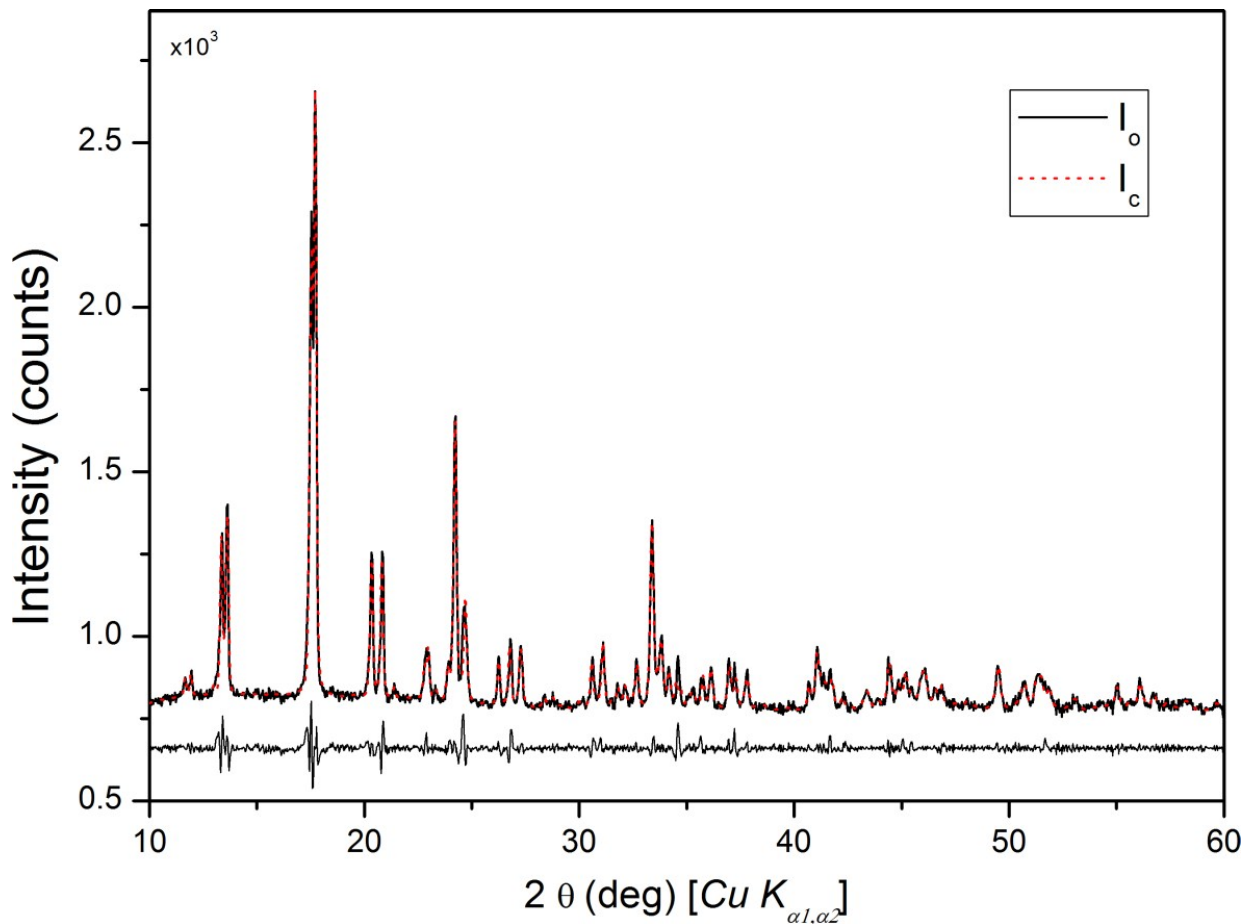

Figure S1. The results of the Le Bail refinement for bnMn powder at room temperature. The crystal system monoclinic, space group  $Cc$ . The final agreement R factors for the profile:  $R_p$ :0.010;  $wR_p$ =0.017;  $GooF$ =0.015; The refined lattice parameters:  $a$ =9.569(2) $\text{\AA}$ ,  $b$ =15.303(2) $\text{\AA}$ ,  $c$ =13.711(2) $\text{\AA}$ .  $I_o$  and  $I_c$  denote observed and calculated intensities, respectively. The difference plot is given at the bottom. Jana2006 was used for the calculations [Petricek, V., Dusek, M. & Palatinus, L. (2014). *Z. Kristallogr.* 229(5), 345-352].

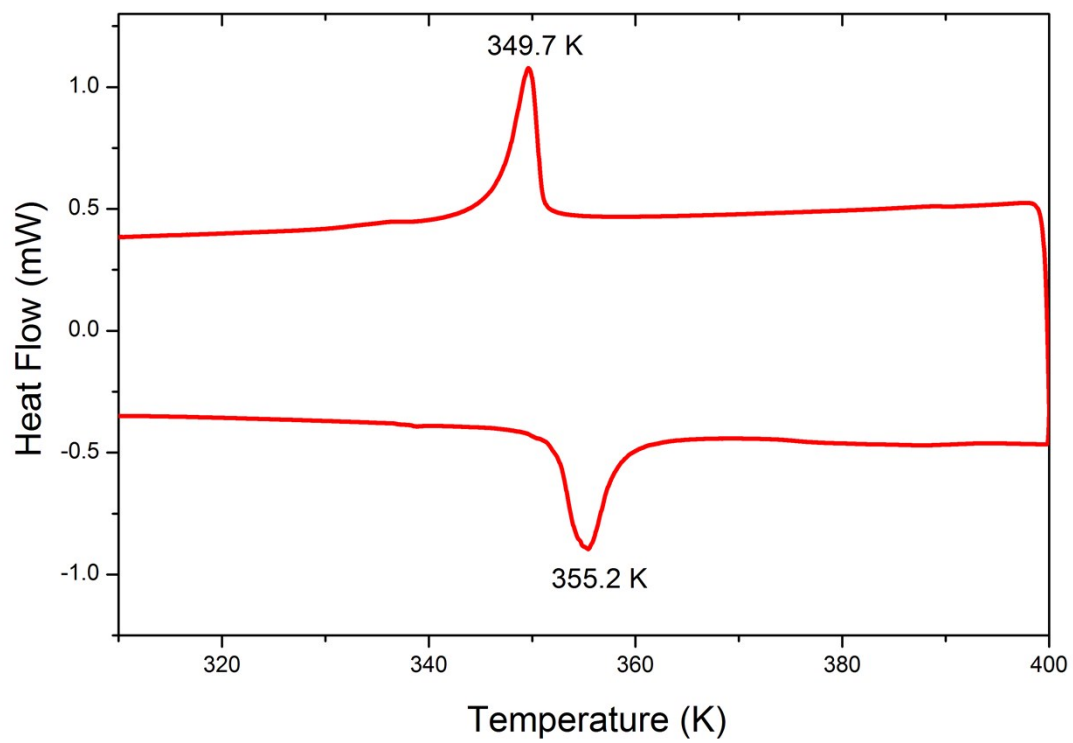

Figure S2. DSC traces for bnMn in heating and cooling mode.

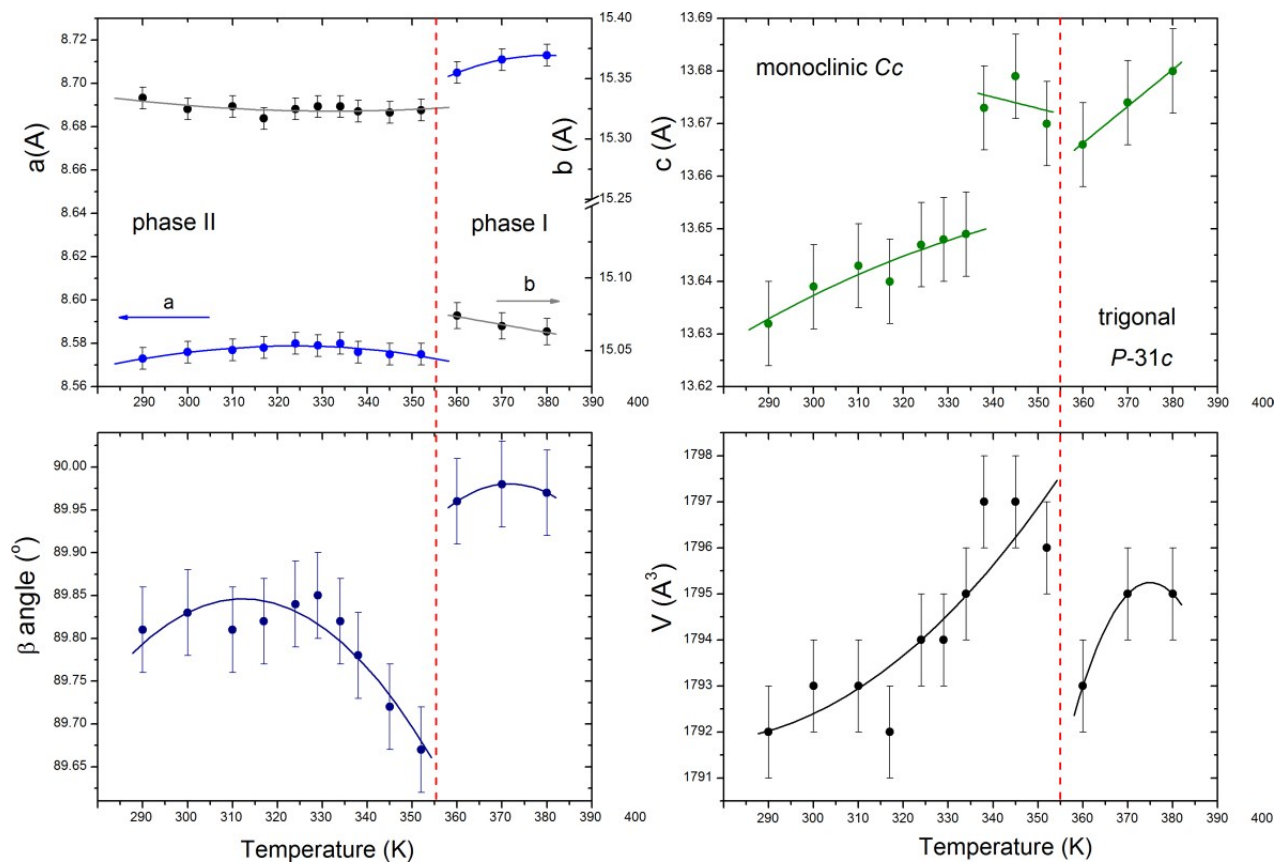

Figure S3. Temperature evolution of monoclinic lattice parameters in bnMn during heating. The lines are the guides for eyes.

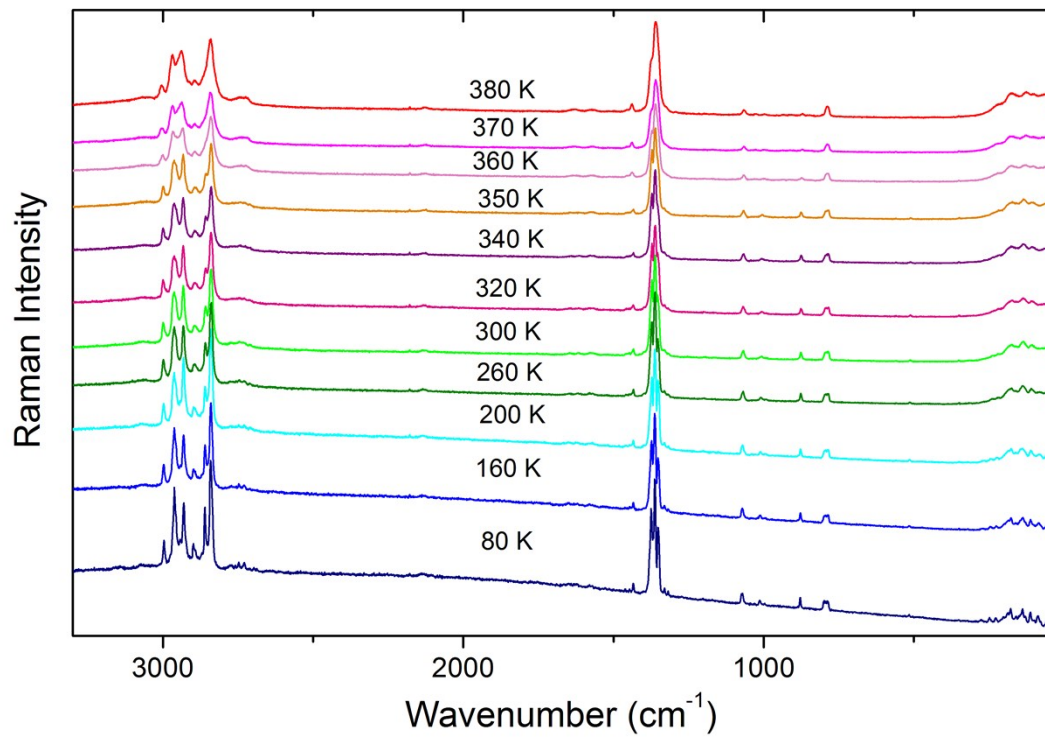

Figure S4. Raman spectra of bnMn recorded at various temperatures.

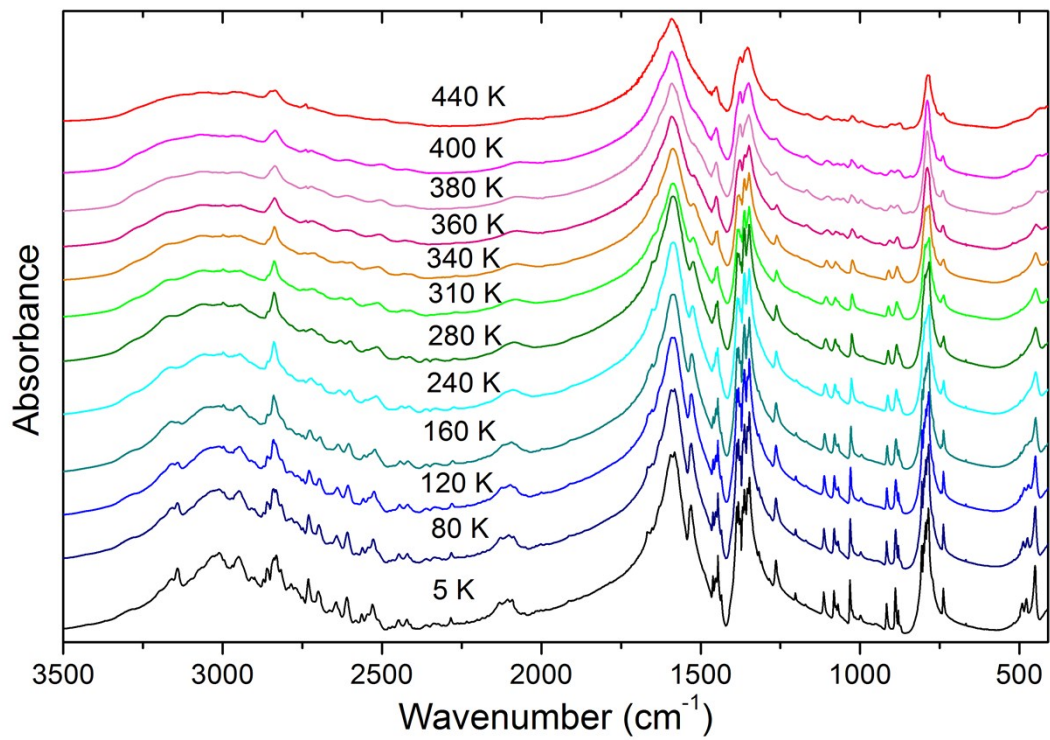

Figure S5. IR spectra of bnMn recorded at various temperatures in the 400-3500  $\text{cm}^{-1}$  range.



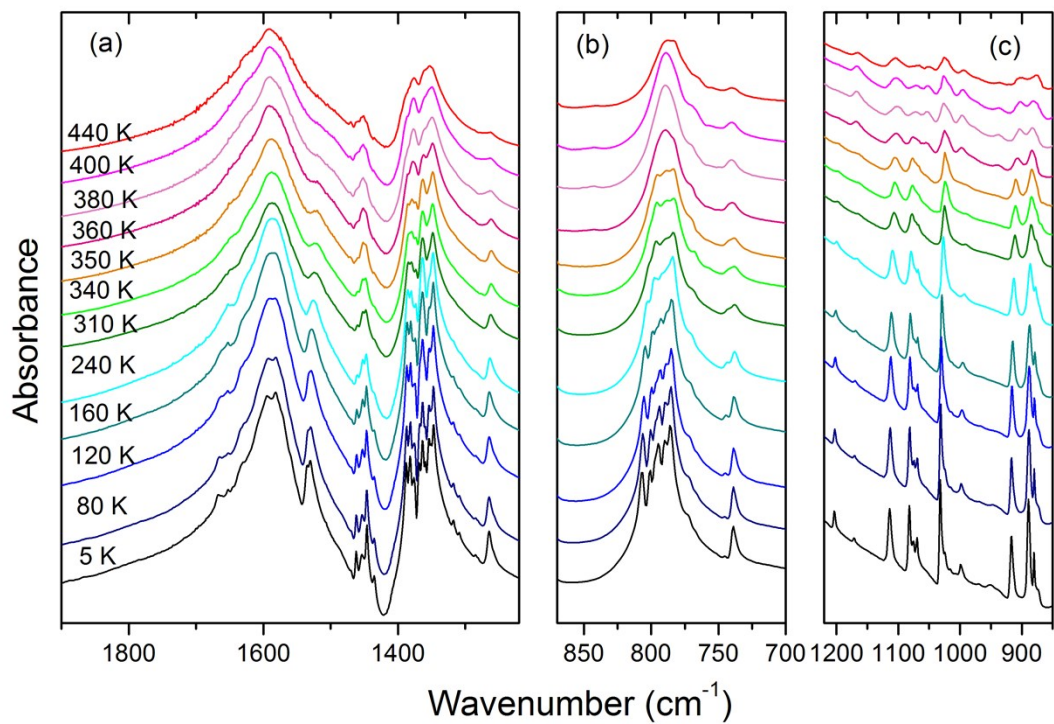

Figure S6. Detail of the IR spectra corresponding to the spectral ranges 1220-1900, 700-870 and 850-1220 cm<sup>-1</sup> at different temperatures.

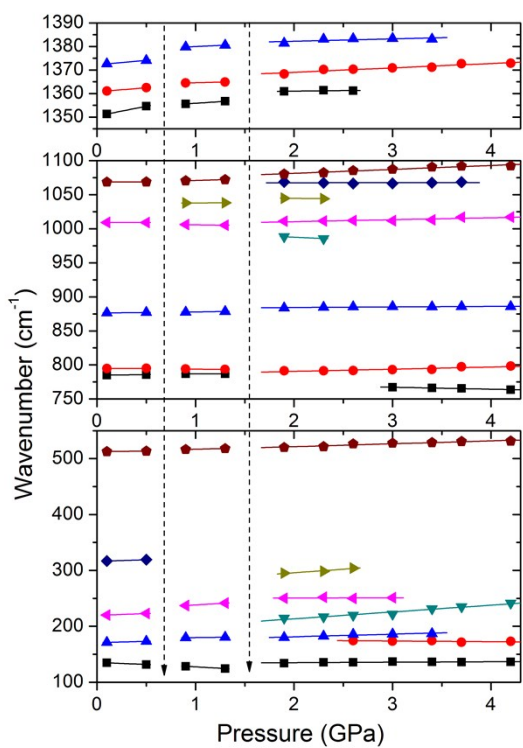

Figure S7. Wavenumber vs. pressure plots of the Raman modes observed in bnMn crystal for compression experiment. The solid lines are linear fits on the data to  $\omega(P) = \omega_0 + \alpha P$ . Vertical lines show the pressures at which structural phase transitions occur.

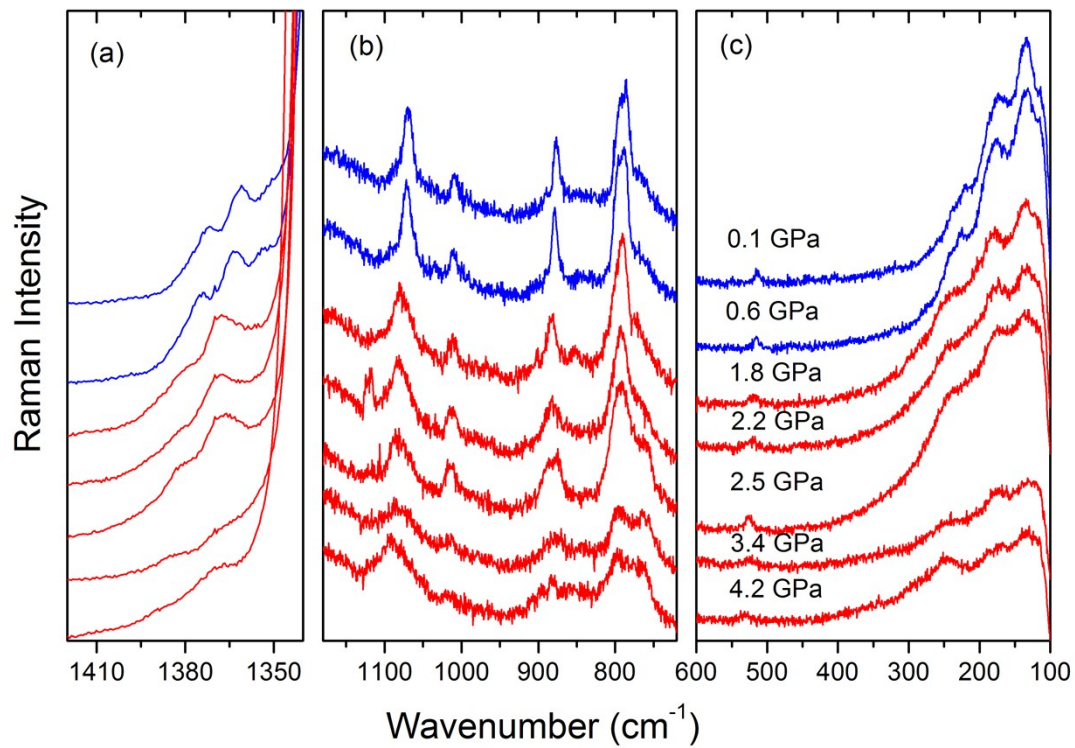

Figure S8. Raman spectra of bnMn recorded during decompression experiment.
